# Supplementary material for: Direct analysis of the actin-filament formation effect in photodynamic therapy
Source: Royal Society of Chemistry journal article supplement (doi:10.1039/d1ra09291j), 2022-01-01
Supplement: d1ra09291j1.pdf [file d1ra09291j1.pdf]

## Supplementary information

### Direct analysis of stress-fiber formation effect in photodynamic therapy

*Atsushi Taninaka*<sup>1,2</sup>, *Shunta Ugajin*<sup>1</sup>, *Hiromi Kurokawa*<sup>3</sup>, *Yu Nagoshi*<sup>1</sup>, *Mayuka Kamiyanagi*<sup>1</sup>,

*Osamu Takeuchi*<sup>1</sup>, *Hirofumi Matsui*<sup>3</sup>, and *Hidemi Shigekawa*<sup>1\*</sup>

<sup>1</sup>Faculty of Pure and Applied Sciences, University of Tsukuba, 305-8573 Ibaraki, Japan

<sup>2</sup>TAKANO Co., LTD., Miyano-mura, Kamiina-gun, Nagano, 399-4301 Japan

<sup>3</sup>Faculty of medicine, University of Tsukuba, 305-8575 Ibaraki, Japan

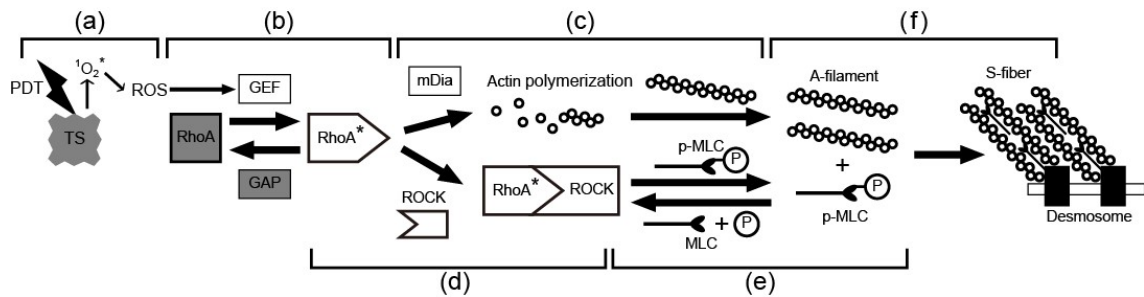

Fig. S1 Model for the mechanism of stress fiber formation by PDT. (a) When a photosensitizer (TS) taken up into cells is irradiated with light, singlet oxygen is generated and converted to active oxygen (ROS)<sup>1-3</sup>. ROS is known to activate RhoA<sup>2,4-7</sup>. (b) RhoA activation is regulated by guanine nucleotide exchange factor (GEF) and GTPase activating protein (GAP)<sup>4,8,9</sup>. (c) RhoA\* activated by GEF acts on Mammalian diaphanous-related formin (mDia) and promotes actin polymerization<sup>10-13</sup>. (d), (e) On the other hand, activated RhoA\* binds to Rho-associated protein kinase (ROCK) and promotes phosphorylation of the myosin light chain<sup>4,6,7,9,12,14-16</sup>. (f) S-fiber is formed by the formed A-filament and myosin-light chain. S-fiber binds to desmosomes, and their tension determines the elastic modulus of the cell.

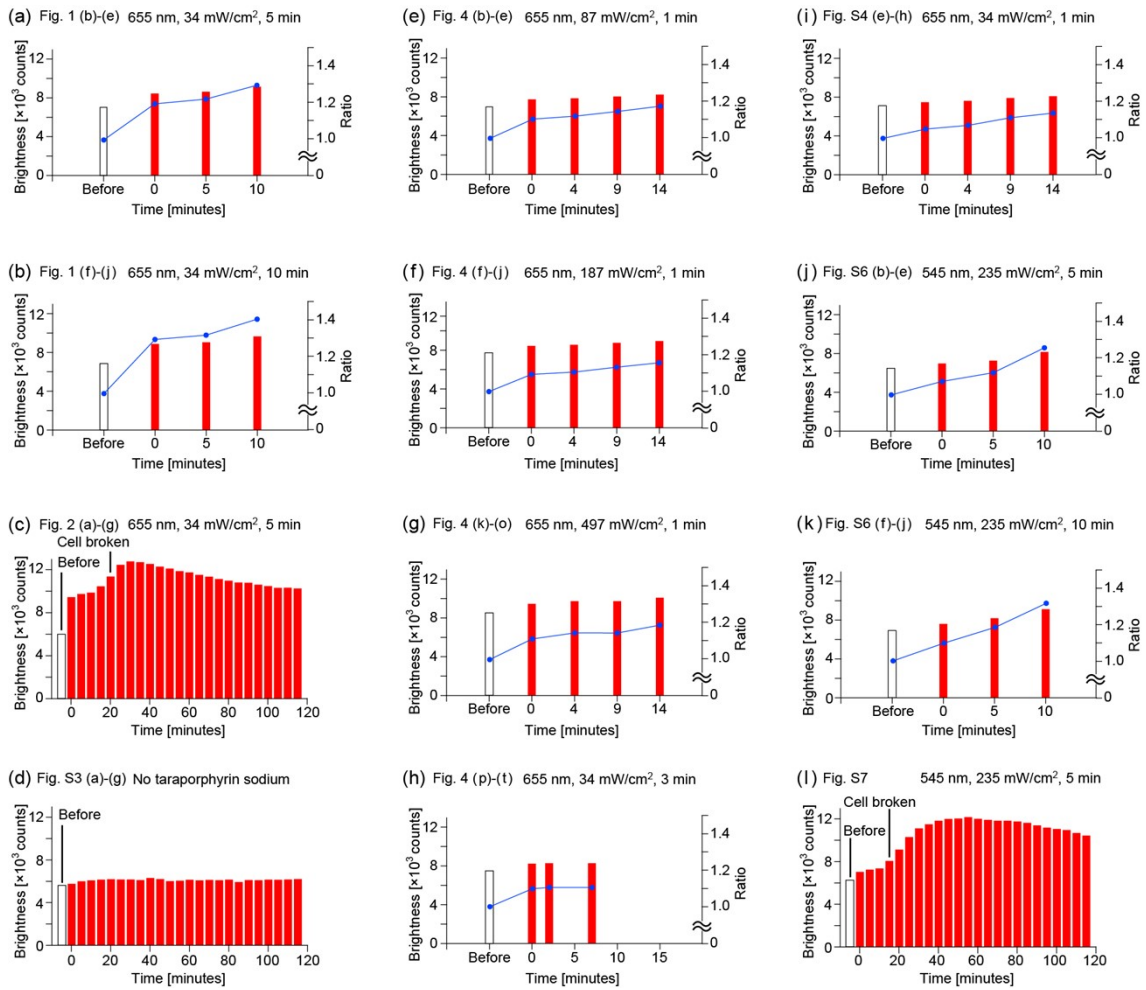

Fig. S2 Results of quantifying the intensity of the fluorescence images in the text. The CCD measurement intensity values of one pixel ( $6.45 \times 6.45 \mu\text{m}^2$ ) were averaged over each image.

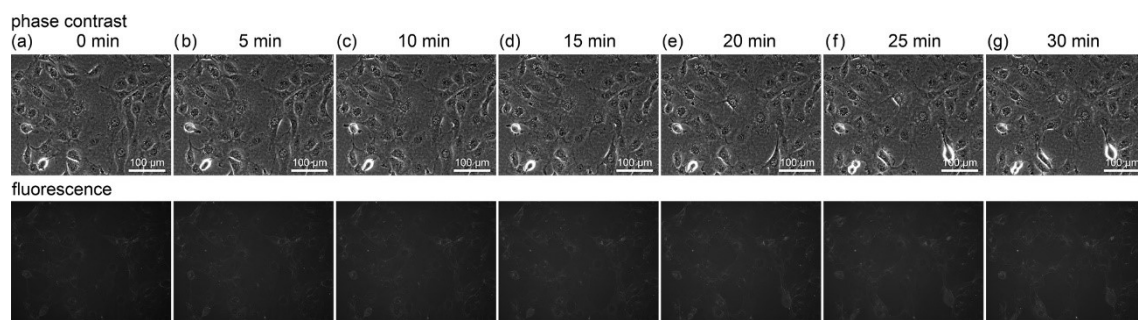

Fig. S3 Phase difference observation images (upper) and fluorescence observation images (lower) when only SPY555-actin fluorescent probe is inserted.

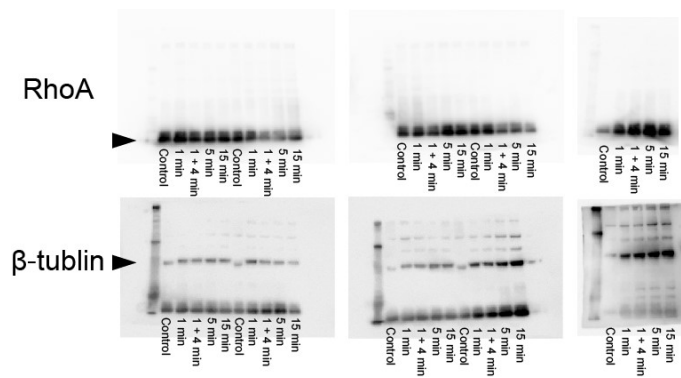

Fig. S4 Western blotting data used to make Fig. 3b.

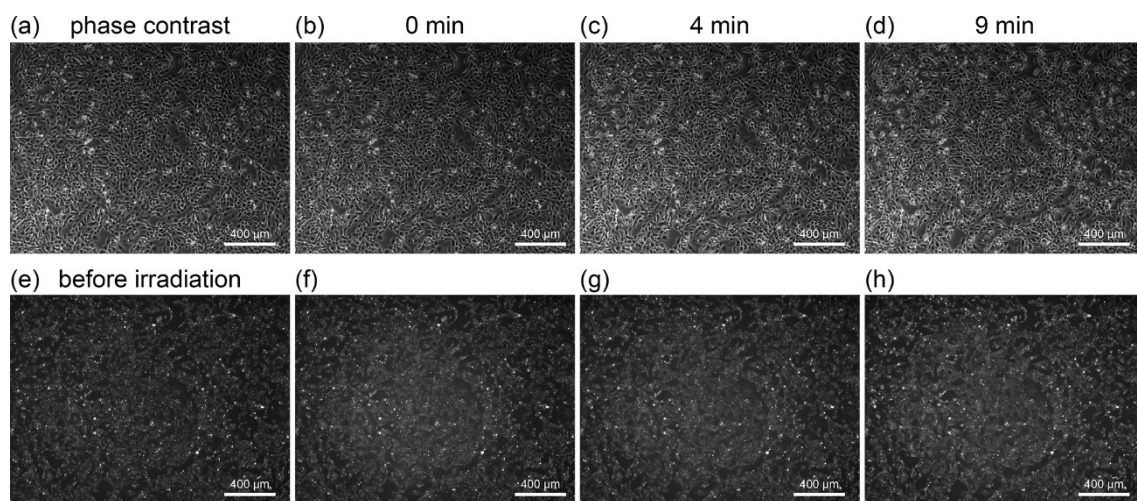

Figure S5

Phase contrast images ((a)-(d)) and fluorescence images ((e)-(h)) immediately, 4, and 9 minutes after light irradiation with an intensity of  $34 \text{ mW/cm}^2$  for 1 min.

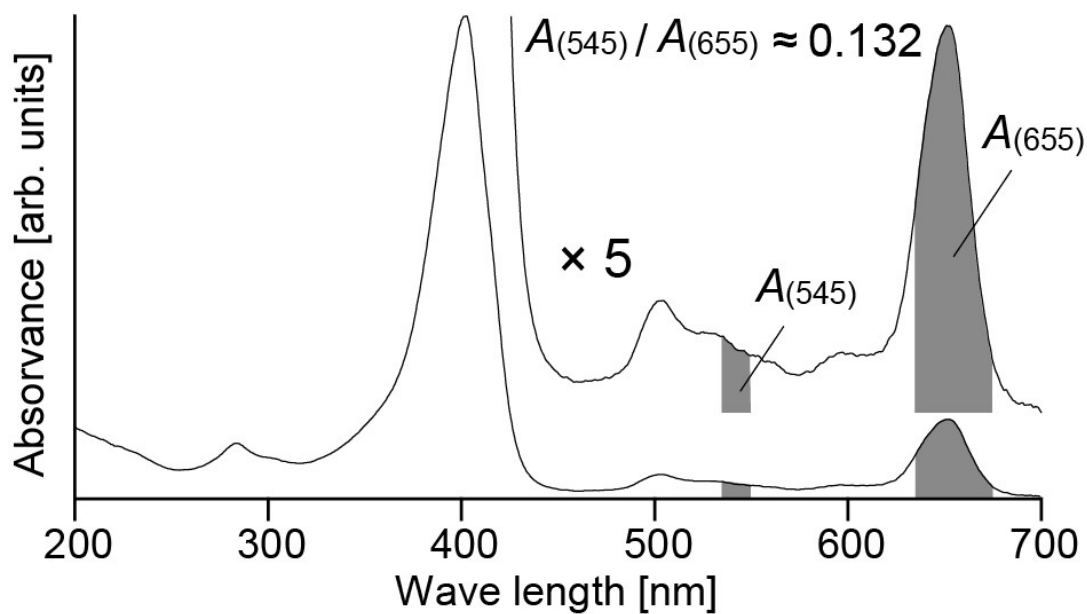

Figure S6

Ultraviolet-visible (UV-Vis) range absorption spectrum of aqueous solution of taraporphyrin sodium.  $A_{(545)}$  and  $A_{(655)}$  indicate the areas for the irradiation with center wavelengths of 545 and 655 nm, respectively.

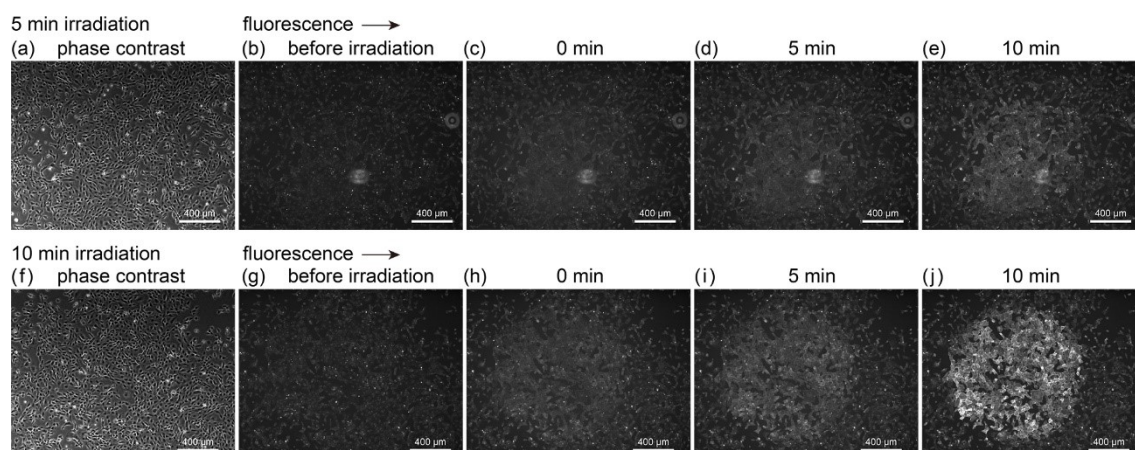

Figure S7

Results obtained by irradiating RGK1 with light with a center wavelength of 545 nm and an intensity of  $235 \text{ mW/cm}^2$  for 5 minutes ((a) to (e)) and 10 minutes ((f)-(j)), (a), (f) Phase contrast images before light irradiation and fluorescence images (b), (g) before light irradiation, (c), (h) immediately after light irradiation, (d), (i) 5 minutes after light irradiation, and (e), (j) 10 minutes after light irradiation.



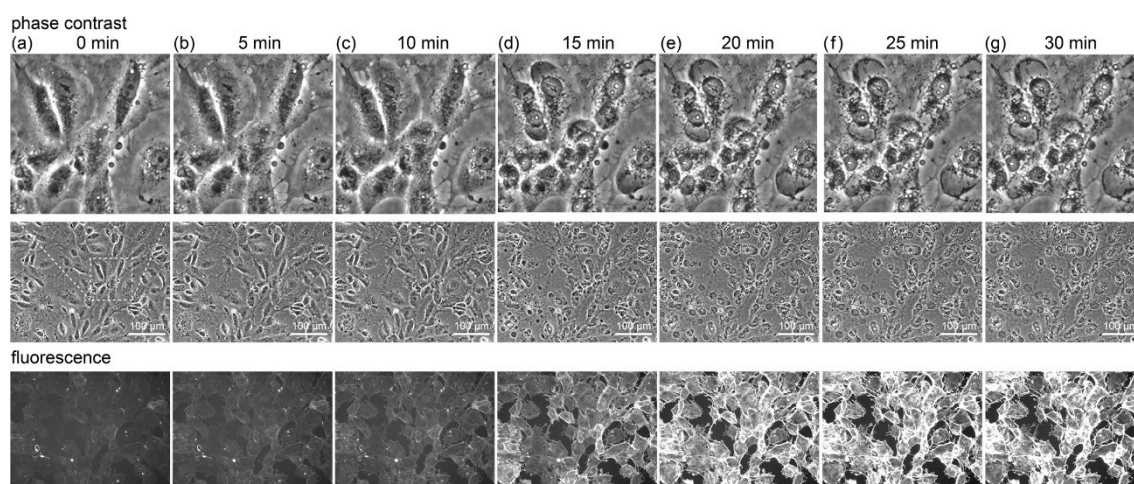

Figure S8

Phase contrast images (middle row) and their magnifications (top row), and fluorescence images (bottom row) of RGK1 when light with a central wavelength of 545 nm and an intensity of 235 mW/cm<sup>2</sup> was irradiated for 5 minutes. (a) Immediately, (b) 5 min, (c) 10 min, (d) 15 min, (e) 20 min, (f) 25 min, and (g) 30 min after irradiation.

Movie S1

Movie showing the effect of PDT on RGK1 obtained by irradiation with light with a center wavelength of 655 nm and an intensity of 87 mW/cm<sup>2</sup> for 1 minute.

## References

- 1 M. Ethirajan, Y. Chen, P. Joshi and R. K. Pandey, The role of porphyrin chemistry in tumor imaging and photodynamic therapy, *Chem. Soc. Rev.*, 2010, **40**, 340–362.
- 2 W. M. Sharman, C. M. Allen and J. E. van Lier, in *Methods in Enzymology*, Academic Press, 2000, vol. 319, pp. 376–400.
- 3 C. S. Foote, DEFINITION OF TYPE I and TYPE II PHOTSENSITIZED OXIDATION, *Photochem. Photobiol.*, 1991, **54**, 659–659.
- 4 A. Wirth, Rho kinase and hypertension, *Biochim. Biophys. Acta BBA - Mol. Basis Dis.*, 2010, **1802**, 1276–1284.
- 5 Kajimoto Hidemi, Hashimoto Kyoko, Bonnet Sandra N., Haromy Alois, Harry Gwyneth, Moudgil Rohit, Nakanishi Toshio, Rebeyka Ivan, Thébaud Bernard, Michelakis Evangelos D., and Archer Stephen L., Oxygen Activates the Rho/Rho-Kinase Pathway and Induces RhoB and ROCK-1 Expression in Human and Rabbit Ductus Arteriosus by Increasing Mitochondria-Derived Reactive Oxygen Species, *Circulation*, 2007, **115**, 1777–1788.
- 6 T. Suzuki, M. Tanaka, M. Sasaki, H. Ichikawa, H. Nishie and H. Kataoka, Vascular Shutdown by Photodynamic Therapy Using Talaporfin Sodium, *Cancers*, 2020, **12**, 2369.
- 7 S. Cavin, T. Riedel, P. Roskopfova, M. Gonzalez, G. Baldini, M. Zellweger, G. Wagnières, P. J. Dyson, H.-B. Ris, T. Krueger and J. Y. Perentes, Vascular-targeted low dose photodynamic therapy stabilizes tumor vessels by modulating pericyte contractility, *Lasers Surg. Med.*, 2019, **51**, 550–561.
- 8 S. Etienne-Manneville and A. Hall, Rho GTPases in cell biology, *Nature*, 2002, **420**, 629–635.
- 9 S. Hartmann, A. J. Ridley and S. Lutz, The Function of Rho-Associated Kinases ROCK1 and ROCK2 in the Pathogenesis of Cardiovascular Disease, *Front. Pharmacol.*, , DOI:10.3389/fphar.2015.00276.
- 10 H. Mizuno, K. Tanaka, S. Yamashiro, A. Narita and N. Watanabe, Helical rotation of the diaphanous-related formin mDia1 generates actin filaments resistant to cofilin, *Proc. Natl. Acad. Sci.*, 2018, **115**, E5000–E5007.
- 11 K. Zaoui, S. Honoré, D. Isnardon, D. Braguer and A. Badache, Memo–RhoA–mDia1 signaling controls microtubules, the actin network, and adhesion site formation in migrating cells, *J. Cell Biol.*, 2008, **183**, 401–408.
- 12 S. Narumiya, M. Tanji and T. Ishizaki, Rho signaling, ROCK and mDia1, in transformation, metastasis and invasion, *Cancer Metastasis Rev.*, 2009, **28**, 65–76.
- 13 Mizuno H. and Watanabe N., The Role of Rotational Movement of a Mammalian Formin mDia1 in Actin Remodeling, *Seibutsu Butsuri*, 2011, **51**, 218–221.

- 14 K. Burrige, E. Monaghan-Benson and D. M. Graham, Mechanotransduction: from the cell surface to the nucleus via RhoA, *Philos. Trans. R. Soc. B Biol. Sci.*, 2019, **374**, 20180229.
- 15 J. Liu, Y. Wada, M. Katsura, H. Tozawa, N. Erwin, C. M. Kapron, G. Bao and J. Liu, Rho-Associated Coiled-Coil Kinase (ROCK) in Molecular Regulation of Angiogenesis, *Theranostics*, 2018, **8**, 6053–6069.
- 16 K. Rottner and T. E. Stradal, Actin dynamics and turnover in cell motility, *Curr. Opin. Cell Biol.*, 2011, **23**, 569–578.
